# Supplementary material for: Herb-Drug Interaction ofPaullinia cupana(Guarana) Seed Extract on the Pharmacokinetics of Amiodarone in Rats
Source: Hindawi journal article supplement (doi:10.1155/2012/428560), 2012-01-01

# GUARANA EXTRACT 12%

*Paullinia cupana*

## CERTIFICATE OF ANALYSIS

Ref. 410044 - Batch 0805519

|                                                                      | Methods                      | Specifications                     | Results  |
|----------------------------------------------------------------------|------------------------------|------------------------------------|----------|
| <b>● MAIN CHARACTERISTICS</b>                                        |                              |                                    |          |
| Appearance                                                           | Bio Serae                    | free flowing powder                | complies |
| Color                                                                | Bio Serae                    | light brown                        | complies |
| Carrier                                                              | Bio Serae                    | maltodextrin                       | complies |
| Nature                                                               | Bio Serae                    | alcoholic (30%) extract from seeds | complies |
| Odor                                                                 | Bio Serae                    | slight                             | complies |
| Taste                                                                | Bio Serae                    | bitter                             | complies |
| <b>● ACTIVE INGREDIENTS</b>                                          |                              |                                    |          |
| Caffeine (%/RM)                                                      | HPLC - UV                    | ≥ 12                               | 12,7     |
| <b>● MICROBIOLOGICAL</b>                                             |                              |                                    |          |
| Escherichia coli (CFU/10g)                                           | Eur. Ph. 2000 [§2.6.13]      | negative                           | negative |
| Total plate count (CFU/g)                                            | NF ISO 4833                  | < 5 000                            | < 10     |
| Yeasts and moulds (CFU/g)                                            | AOAC 997.02                  | < 100                              | < 10     |
| Salmonella (CFU/25g)                                                 | AES 10/04-05/04              | negative                           | negative |
| Staphylococcus aureus (DNAse +) (CFU/10g)                            | Eur. Ph. 2000 [§2.6.13]      | negative                           | negative |
| <b>● OTHER ANALYTICAL DATA</b>                                       |                              |                                    |          |
| Ashes (%/RM)                                                         | JORF (8 sept. 77)            | < 2                                | 0,49     |
| Bulk density                                                         | Eur. Ph.1997 (§ 2.9.15)      | > 0,30                             | 0,66     |
| Dry matter (%)                                                       | Eur.Ph.1997(§2.2.32 - 105°C) | > 90                               | 95,3     |
| Water solubility (10g/L)                                             | NF EN 872 - GFC adapted      | soluble                            | complies |
| <b>● CONTAMINANTS</b>                                                |                              |                                    |          |
| Cadmium (ppm)                                                        | Mineralization + ICP-MS      | < 0,5                              | < 0,002  |
| Heavy metals (lead eq.) (ppm)                                        | Eur. Ph. 2000 [§2,4,8D]      | < 15                               | < 10     |
| GMO status                                                           | 1829-1830/2003CE             | Conventional ingredient            | complies |
| Lead (ppm)                                                           | Mineralization + ICP-MS      | < 1                                | < 0,03   |
| <b>● STORAGE</b>                                                     |                              |                                    |          |
| 24 months If kept in a dry and cool place in original intact packing |                              |                                    |          |
| Manufacturing / analysis date :                                      | 04 / 2008                    |                                    |          |
| Best before :                                                        | 04 / 2010                    |                                    |          |

The information here above is based on our current knowledge. BIO SERAE cannot be hold responsible besides the guarantees written on its supply contracts, based on the fact that it does not control the final use of this product. It is the buyer's responsibility to comply with local texts and laws regulating its activity and the use of this product.

CFU = Colony-Forming Unit  
DM = Dry Matter  
RM = Raw Matter

Bram, 02-sept-08

**Qualified batch**

Mr. Murat  
Quality Control Department

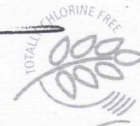

Supplement: f1 [file 428560.f1.pdf]
